# Supplementary material
Source: ML conference proceedings conference paper supplement (https://openreview.net/forum?id=H2EeD88sqec)
Supplement: supplementary_material [file attachment]

---

# Voronoi Density Estimator for High-Dimensional Data: Computation, Compactification and Convergence (Supplementary Material)

---

Vladislav Polianskii\*<sup>1</sup>

Giovanni Luca Marchetti\*<sup>1</sup>

Alexander Kravberg<sup>1</sup>

Anastasiia Varava

Florian T. Pokorny<sup>1</sup>

Danica Kragic<sup>1</sup>

<sup>1</sup>School of Electrical Engineering and Computer Science, Royal Institute of Technology (KTH), Stockholm, Sweden

We provide here a proof of our main theoretical result with full details.

**Theorem 4.1.** *Suppose that  $\rho$  has support in the whole  $\mathbb{R}^n$ . For any  $K \in L^1(\mathbb{R}^n \times \mathbb{R}^n)$  the sequence of random probability measures  $\mathbb{P}_m = f dx$  defined by the CVDE with  $m$  generators converges to  $\mathbb{P}$  in distribution w.r.t.  $x$  and in probability w.r.t.  $P$ . Namely, for any measurable set  $E \subseteq \mathbb{R}^n$  the sequence  $\mathbb{P}_m(E)$  of random variables over  $P$  sampled from  $\rho$  converges in probability to the constant  $\mathbb{P}(E)$ .*

We shall first build up some machinery necessary for the proof. First of all, the following fact on higher-dimensional Euclidean geometry will come in hand.

**Proposition 4.2.** (Gibbs and Chen 2020, Lemma 5.3) *Let  $x \in \mathbb{R}^n$ ,  $\delta > 0$ . There exist constants  $1 < c_1 < c_2 - 1 < 31$  such that for any open cone  $K \subseteq \mathbb{R}^n$  centered at  $x$  of solid angle  $\frac{\pi}{12}$  and any  $p, q, z \in K$ , if*

$$d(x, p) < \delta, c_1\delta \leq d(x, q) < c_2\delta, d(x, z) \geq 32\delta$$

then  $d(z, q) < d(z, p)$ .

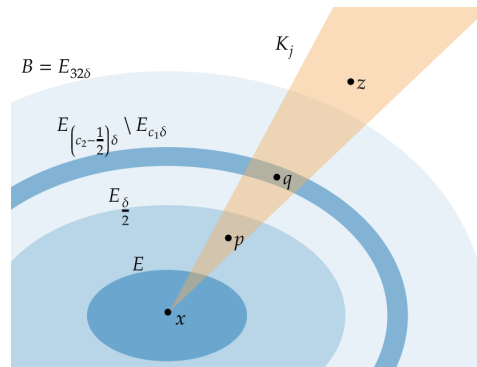

Figure 1: Graphical depiction of sets and points appearing in the proof of Proposition 4.3.

We can now deduce the following.

**Proposition 4.3.** *Let  $\emptyset \neq E \subseteq \mathbb{R}^n$  be a bounded measurable set. There exists a bounded measurable set  $B \supseteq E$  such that as  $m = |P|$  tends to  $\infty$ , the probability with respect to  $P \sim \rho^m$  that every Voronoi cell intersecting  $E$  is contained in  $B$  tends to 1.*

---

\*Equal contribution.

*Proof.* Let  $\delta = 2\text{diam } E = 2\sup_{x,y \in E} d(x,y)$  be twice the diameter of  $E$ . For  $L > 0$ , consider the  $L$ -neighbourhood of  $E$

$$E_L = \{x \in X \mid d(x, E) < L\}.$$

First of all, if  $E$  has vanishing measure, we can replace it without loss of generality by some  $E_L$ , which has nonempty interior.

We claim that  $B = E_{32\delta}$  is as desired. To see that, consider an arbitrary  $x \in E$  and let  $\{K_j\}_j$  be a finite minimal set of open cones centered at  $x$  of solid angle  $\frac{\pi}{12}$  whose closures cover  $\mathbb{R}^n$ . As  $m$  tends to  $\infty$ , since  $\rho$  has support in the whole  $\mathbb{R}^n$ , by the law of large numbers the probability of the following tends to 1:

- $P$  intersects  $E$  (recall that  $E$  has non-vanishing measure),
- for every  $j$ ,  $P$  intersects  $(E_{(c_2 - \frac{1}{2})\delta} \setminus E_{c_1\delta}) \cap K_j$ , where  $c_1, c_2$  are the constants from Proposition 4.2.

To prove our claim, we can thus conditionally assume the above. Consider now a Voronoi cell intersecting  $E$  and suppose by contradiction that  $z$  is an element of the cell not contained in  $B$ . Let  $q \in P$  be a generator in  $(E_{(c_2 - \frac{1}{2})\delta} \setminus E_{c_1\delta}) \cap K_j$  where  $K_j$  is the cone containing  $z$ . Since  $P$  intersects  $E$ , the generator  $p$  of the cell lies in  $E_{\text{diam}(E)} = E_{\frac{\delta}{2}}$  and consequently  $d(x, p) < \delta$ . If  $p \notin K_j$ , then one can replace it with its orthogonal projection on the line passing through  $x$  and  $z$ . The hypotheses of Proposition 4.2 are then satisfied and we conclude that  $d(z, q) < d(z, p)$ . This is absurd since  $p$  is the generator of  $C(z)$ .  $\square$

For a bounded measurable set  $E \subseteq \mathbb{R}^n$ , denote by

$$D_E = \max_{\substack{p \in P \\ C(p) \cap E \neq \emptyset}} \text{diam } C(p)$$

the maximum diameter of a Voronoi cell intersecting  $E$ .

**Proposition 4.4.**  $D_E$ , thought as a random variable in  $P$ , converges in probability to 0 as  $m = |P|$  tends to  $\infty$ .

*Proof.* The proof is inspired by Theorem 4 in Devroye et al. 2015. Consider a finite minimal set of open cones  $\{K_j\}_j$  centered at 0 of solid angle  $\frac{\pi}{12}$  whose closures cover  $\mathbb{R}^n$ . Then there is a constant  $c > 0$  such that for each  $p \in P$

$$\text{diam } C(p) \leq c \max_j R_{p,j}$$

where  $R_{p,j} = \min_{q \in P \cap (p + K_j)} d(p, q)$  denotes the distance from  $p$  to its closest neighbour in the cone  $K_j$  centered in  $p$  (and  $R_{p,j} = \infty$  if  $P \cap (p + K_j) = \emptyset$ ). This follows from Proposition 4.2 applied with  $x = p$  to all the cones centered at the generators, with an opportune  $\delta$  for each of them. For each  $\varepsilon > 0$  we thus have an inclusion of events

$$\{D_E > \varepsilon\} \subseteq \left\{ \max_{\substack{p,j \\ C(p) \cap E \neq \emptyset}} R_{p,j} > \frac{\varepsilon}{c} \right\} \subseteq \bigcup_{i,j} \left\{ P \cap (p_i + K_j) \cap B\left(p_i, \frac{\varepsilon}{c}\right) = \emptyset \text{ and } C(p_i) \cap E \neq \emptyset \right\}$$

where  $B(x, r)$  is the open ball centered in  $x$  of radius  $r$ . In the above, we assumed that the set  $P$  is equipped with an ordering. For  $x \in \mathbb{R}^n$  denote by  $E_{x,j}$  the event appearing at the right member of the above expression for  $x = p_i$ . We can then bound the probability with respect to a random  $P \sim \rho^m$ , with  $m = |P|$  fixed, as

$$\mathbb{P}_{P \sim \rho^m}(D_E > \varepsilon) \leq \sum_{i,j} \mathbb{P}_{P \sim \rho^m}(E_{p_i,j}) = m \sum_j \int_{\mathbb{R}^n} \rho(x) \mathbb{P}_{P \sim \rho^m}(E_{x,j} \mid p_1 = x) \, dx.$$

Since the points in  $P$  are sampled independently we have

$$\mathbb{P}_{P \sim \rho^m}(E_{x,j} \mid p_1 = x, C(x) \cap E \neq \emptyset) = \left(1 - \mathbb{P}\left((x + K_j) \cap B\left(x, \frac{\varepsilon}{c}\right)\right)\right)^{m-1} := (1 - M(x))^{m-1}.$$

Pick the set  $B$  guaranteed by Proposition 4.3. We can then conditionally assume that every Voronoi cell intersecting  $E$  is contained in  $B$ , which implies  $\mathbb{P}_{P \sim \rho^m}(E_{x,j}) = 0$  for  $x \notin B$ . The limit we wish to estimate reduces to

$$\lim_{m \rightarrow \infty} m \sum_j \int_{\mathbb{R}^n} \rho(x) \mathbb{P}_{P \sim \rho^m}(E_{x,j} \mid p_1 = x) dx = \sum_j \lim_{m \rightarrow \infty} \int_B \rho(x) m (1 - M(x))^{m-1} dx.$$

Since  $B$  is bounded and  $\rho$  has support in the whole  $\mathbb{R}^n$ ,  $M(x)$  is (essentially) bounded from below by a strictly positive constant as  $x$  varies in  $B$ . The limit can thus be brought under the integral and putting everything together we get:

$$\lim_{m \rightarrow \infty} \mathbb{P}_{P \sim \rho^m}(D_E > \varepsilon) \leq \sum_j \int_B \rho(x) \lim_{m \rightarrow \infty} m (1 - M(x))^{m-1} dx = 0.$$

□

We are now ready to prove Theorem 4.1.

*Proof.* By the Portmanteau Lemma (Van der Vaart 2000), it is sufficient to that  $\mathbb{P}_m(E)$  converges to  $\mathbb{P}(E)$  in probability for any bounded measurable set  $E \subseteq \mathbb{R}^n$  which is a continuity set for  $\mathbb{P}$  i.e.,  $\mathbb{P}(\partial E) = 0$  where  $\partial E$  is the (topological) boundary of  $E$ . Pick such  $E$ . By definition of the CVDE, for a fixed set  $P$  of generators we have that

$$\begin{aligned} \mathbb{P}_m(E) &= \frac{1}{m} |\{p \in P \mid C(p) \subseteq E\}| + \frac{1}{m} \overbrace{\sum_{\substack{p \in P \\ C(p) \not\subseteq E \\ C(p) \cap E \neq \emptyset}} \frac{\text{Vol}_p(C(p) \cap E)}{\text{Vol}_p(C(p))}}^{\bar{R}} \\ &= \frac{1}{m} |P \cap E| + \bar{R} - \frac{1}{m} |\{p \in P \cap E \mid C(p) \not\subseteq E\}|. \end{aligned} \quad (1)$$

Since the Voronoi cells are closed, any cell intersecting  $E$  not contained in  $E$  intersects  $\partial E$ . Thus  $|\bar{R} - \frac{1}{m} |\{p \in P \cap E \mid C(p) \not\subseteq E\}|| \leq 2R$  where  $R := \frac{1}{m} |\{p \in P \mid C(p) \cap \partial E \neq \emptyset\}|$ . Now, the random variable  $\frac{1}{m} |P \cap E|$  tends to  $\mathbb{P}(E)$  in probability as  $m$  tends to  $\infty$  by the law of large numbers. In order to conclude, we need to show that  $R$  tends to 0 in probability.

Fix  $\varepsilon > 0$ . For  $L > 0$ , consider the  $L$ -neighbour  $\partial E_L = \{x \in X \mid d(x, \partial E) < L\}$  of the boundary  $\partial E$ . If the diameter of the Voronoi cells intersecting  $\partial E$  is less than  $L$  then all such cells are contained in  $\partial E_L$ . Thus:

$$\begin{aligned} \mathbb{P}_{P \sim \rho^m}(R > \varepsilon) &\leq \mathbb{P}_{P \sim \rho^m} \left( \frac{1}{m} |P \cap \partial E_L| > \varepsilon \text{ and } D_{\partial E} < L \right) + \mathbb{P}_{P \sim \rho^m}(D_{\partial E} \geq L) \\ &\leq \mathbb{P}_{P \sim \rho^m} \left( \frac{1}{m} |P \cap \partial E_L| > \varepsilon \right) + \mathbb{P}_{P \sim \rho^m}(D_{\partial E} \geq L) \\ &\leq \mathbb{P}_{P \sim \rho^m} \left( \left| \mathbb{P}(\partial E_L) - \frac{1}{m} |P \cap \partial E_L| \right| > \varepsilon - \mathbb{P}(\partial E_L) \right) + \mathbb{P}_{P \sim \rho^m}(D_{\partial E} \geq L). \end{aligned} \quad (2)$$

Since  $\partial E$  is closed,  $\partial E = \cap_{L>0} \partial E_L$  and thus  $\lim_{L \rightarrow 0} \mathbb{P}(\partial E_L) = \mathbb{P}(\cap_L \partial E_L) = \mathbb{P}(\partial E) = 0$  since  $E$  is a continuity set. This implies that there is an  $L$  such that  $\varepsilon > \mathbb{P}(\partial E_L)$ . The right hand side of Equation 2 tends then to 0 by the law of large numbers and Proposition 4.4, which concludes the proof.

□

## REFERENCES

- Devroye, Luc et al. (Dec. 2015). "On the measure of Voronoi cells." In: *Journal of Applied Probability* 54. DOI: 10.1017/jpr.2017.7.
- Gibbs, Isaac and Linan Chen (2020). "Asymptotic properties of random Voronoi cells with arbitrary underlying density." In: *Advances in Applied Probability* 52.2, pp. 655–680.
- Van der Vaart, Aad W (2000). *Asymptotic statistics*. Vol. 3. Cambridge university press.
